# Supplementary material for: Metagenomic detection of protozoan parasites on leafy greens aided by a rapid and efficient DNA extraction protocol
Source: Front Microbiol. 2025 Mar 14;16:1566579. doi: 10.3389/fmicb.2025.1566579 (PMC11949954; doi:10.3389/fmicb.2025.1566579)
Supplement: Supplementary file 1 [file Table_1.xlsx]

## Sheet: Supplementary Table S1 
	Supplementary Table 1: Quality and quantity of DNA from lettuce metagenomes spiked with parasites and analyzed by nanopore sequencing
	Lettuce (25 g) spiked With	Spike dose	DNA Quantity1				DNA Quality (A260/A280 ratio)		Total fastq reads (millions)	Respective spiked parasites detected4	Parasite sequence detection by kmer analysis
		(Cysts/oocysts)
			Before WGA4		After WGA4						Unique matches (%)	Frequency
			amplification		amplification2
			DNA	DNA Total Yield (µg)	DNA	DNA Total Yield (µg)	Before DNA Clean up	After DNA Clean up3
			(ng/µl)		(ng/µl)
	Cryptosporidium parvum	1	1.43	0.014	15.3	1.148	1.603	1.923	1.966	No	0	0
		1	1	0.01	3.2	0.24	1.592	2.016	3.207	No	0	0
		1	6.76	0.067	67.4	5.055	1.556	1.906	3.878	No	0	0
		1	1	0.01	27.5	2.063	1.59	1.89	3.159	No	0	0
		2	3.75	0.038	17.2	1.29	1.577	2.003	4.224	Yes	0.02	17
		2	7.89	0.079	34.3	2.573	1.604	1.951	3.157	No	0	0
		5	1.47	0.015	25.7	1.928	1.633	1.869	1.234	No	0	0
		5	13.6	0.136	31.6	2.37	1.6	1.928	2.665	Yes	0.02	6
		10	5.87	0.059	2.17	0.163	1.576	1.785	0.079	Yes	0.02	7
		10	2.18	0.022	43	3.225	1.589	1.938	3.342	Yes	0.08	53
		10	1.65	0.0165	75.8	5.685	1.641	1.854	0.296	Yes	0.92	300
		10	1.8	0.018	64.9	4.868	1.629	1.834	0.296	Yes	4.39	1684
		10	0.616	0.0062	110	8.25	1.465	1.947	0.9	Yes	0.02	7
		25	3.09	0.031	15.6	1.17	1.588	1.901	3.29	Yes	0.05	37
		25	2.26	0.023	47.3	3.548	1.558	1.902	0.098	No	0..00	0
		100	1.64	0.0164	84.2	6.315	1.747	1.848	0.104	Yes	6.65	2301
		100	14.3	0.143	71.2	5.34	1.593	1.926	0.66	Yes	0.08	25
		250	0.674	0.0067	80.9	6.068	1.519	1.918	1.206	Yes	0.04	11
		500	0.86	0.0086	73	5.475	1.49	1.949	0.837	Yes	0.02	7
		500	14.9	0.149	39.3	2.948	1.573	1.998	0.562	Yes	0.04	11
		500	20.7	0.207	2.66	0.7	1.602	1.785	0.329	Yes	0.02	7
		1000	17.3	0.173	74.5	5.588	1.323	1.856	0.879	Yes	0.14	42
		1000	40	0.4	2.12	0.159	1.578	1.891	1.044	Yes	0.02	7
		1000	1.58	0.0158	81.3	6.1	1.603	1.846	0.4	Yes	52.55	34361
		10000	16.8	0.168	92.1	6.907	1.621	2.05	1.954	Yes	0.04	12
		10000	16.5	0.165	21.1	1.582	1.458	1.981	0.686	Yes	38.04	26956
		100000	17.9	0.179	80.2	6.015	1.291	1.782	1.999	Yes	0.87	278
		100000	18	0.18	90	6.75	1.364	1.831	0.984	Yes	44.35	36873
		100000	15.8	0.158	73.2	5.49	1.632	1.926	1.192	Yes	0.39	124
	Cryptosporidium muris	1000	22.7	0.227	96.7	7.253	1.336	1.951	0.38	Yes	0.02	10
		1000	42.6	0.426	54.6	4.095	1.568	1.877	0.168	Yes	0.02	8
		5000	3.66	0.0366	52.3	3.923	1.356	1.902	0.796	Yes	0.02	7
		5000	2.21	0.0221	26.1	1.958	1.643	1.813	0.108	Yes	0.02	7
		100000	16.5	0.165	14.7	1.102	1.201	1.806	4.758	Yes	0.06	31
		1000	N/A	N/A	N/A	N/A	N/A	N/A	2.776	Yes	0.05	10
	Cryptosporidium hominis	5000	N/A	N/A	N/A	N/A	1.588	1.898	2.366	Yes	0.07	22
		5000	N/A	N/A	N/A	N/A	N/A	N/A	0.2	Yes	0.06	18
		100000	13.5	0.135	39.5	2.962	1.305	1.866	4.452	Yes	0.06	25
	Toxoplasma gondii	100000	33.8	0.338	88.2	6.615	1.241	1.82	13.48	Yes	18.92	8492
	Giardia duodenalis	100	2.62	0.0262	14.8	1.11	1.682	1.792	0.428	Yes	0.02	22
		1000	2.43	0.0243	10.35	0.776	1.652	1.832	0.788	Yes	0.04	15
		5000	2.12	0.0212	58	4.35	1.61	1.797	0.188	Yes	0.02	25
		100000	13.8	0.138	101	7.575	1.631	2.091	1.149	Yes	0.28	89
		100000	14.8	0.148	75.9	5.692	1.432	1.962	3.362	Yes	1.09	383
	Phosphate buffered saline	0	3.18	0.0318	72.4	5.43	1.561	1.913	0.862	No	0	0
		0	3.4	0.034	74.5	5.588	1.683	2.061	2.86	No	0	0
		0	9.8	0.098	115	8.625	1.452	1.936	1.433	No	0	0
		0	N/A	N/A	61.5	4.613	1.569	2.069	1.58	No	0	0
		0	N/A	N/A	70.2	5.265	1.604	4.824	0.95	No	0	0
		0	N/A	N/A	92.1	6.908	1.541	1.932	1.11	No	0	0
		0	N/A	N/A	57.6	4.32	1.237	1.946	1.61	No	0	0
		0	N/A	N/A	171	12.825	N/A	2.015	0.323	No	0	0
		0	N/A	N/A	100	7.5	N/A	1.945	1.822	No	0	0
		0	N/A	N/A	172	12.9	N/A	1.986	1.074	No	0	0
		0	N/A	N/A	69.4	5.205	N/A	1.934	1.317	No	0	0
		0	N/A	N/A	110	8.25	1.547	1.958	0..075	No	0	0
	1DNA concentration was measured with Qubit 2.0 fluorometer using the dsDNA BR (Broad Range) assay kit
	2Amplification was carried out using the GenomePlex® WGA4 whole genome amplification kit
	3DNA was purified with the GeneJET PCR purification kit
	4CosmosID (CosmosID GENIUS®) webportal (https://app.cosmosid.com/samples)
	N/A= Not available
	Nanopore sequencing was carried out with Mk1C sequencer (Oxford Nanopore Technologies, Oxford, United Kingdom).
