# Supplementary material for: Metagenomic detection of protozoan parasites on leafy greens aided by a rapid and efficient DNA extraction protocol
Source: Front Microbiol. 2025 Mar 14;16:1566579. doi: 10.3389/fmicb.2025.1566579 (PMC11949954; doi:10.3389/fmicb.2025.1566579)
Supplement: Supplementary file 3 [file Table_3.xlsx]

## Sheet: Supplementary Table S3
Supplementary Table S3 Detection of Cryptosporidium parvum oocysts using the Ion Gene Studio S5 sequencer
Lettuce (25 g) spiked With	Spike dose (oocysts)	Total obtained reads (Millions)	Spiked parasite detected using CosmosID	Parasite sequence detection by kmer analysis
				Unique matches (%)	Frequency
Cryptosporidium parvum	1	6.67	No	0	0
	1	6.92	No	0	0
	2	3.68	No	0	0
	2	9.85	Yes	0.05	69
	5	11.19	No	0	0
	5	12.49	Yes	0.55	169
	10	5.76	Yes	0.14	159
	25	1.19	Yes	0.2	186
	10000	9.95	Yes	1.24	426
	100000	1.54	Yes	0.44	136
Alternate sequence platform validation of the metagenomic sequencing of lettuce surface contaminants was achieved by sequencing DNA metagenomes from lettuce on the Ion GeneStudio S5 sequencer (ThermoFischer Scientific, Burlington, ON). Sequence reads were submitted to the CosmosID website (www.cosmosid.com) for analysis as described under Materials and Methods.
